# Supplementary material
Source: Springer Nature journal article supplement (https://www.springermedizin.de/resource/supplementary/12876_2010_567_MOESM5_ESM.pdf/9437278)

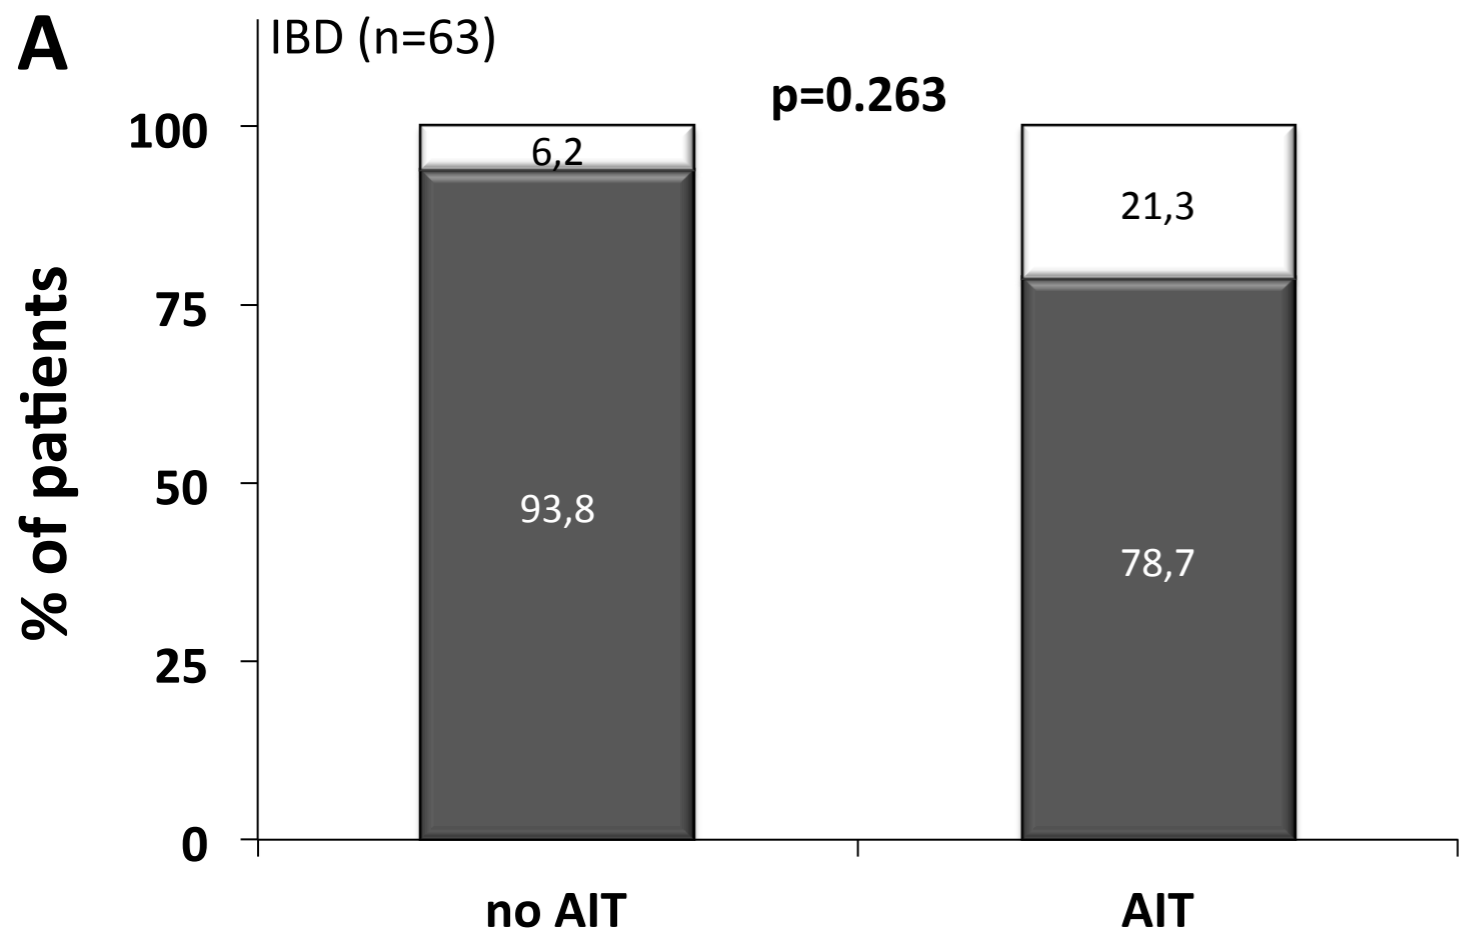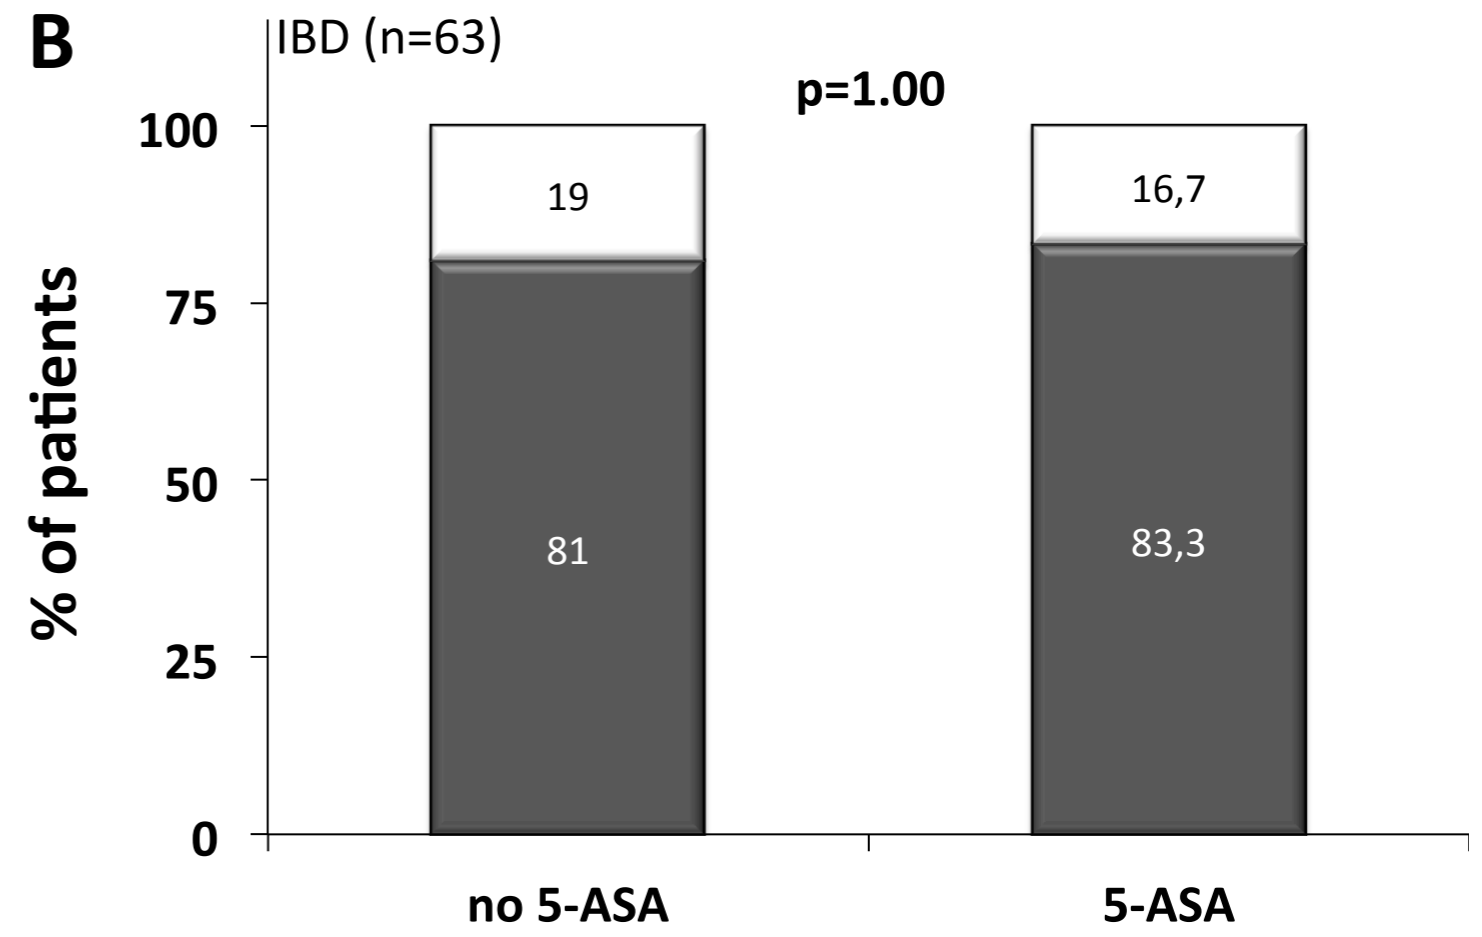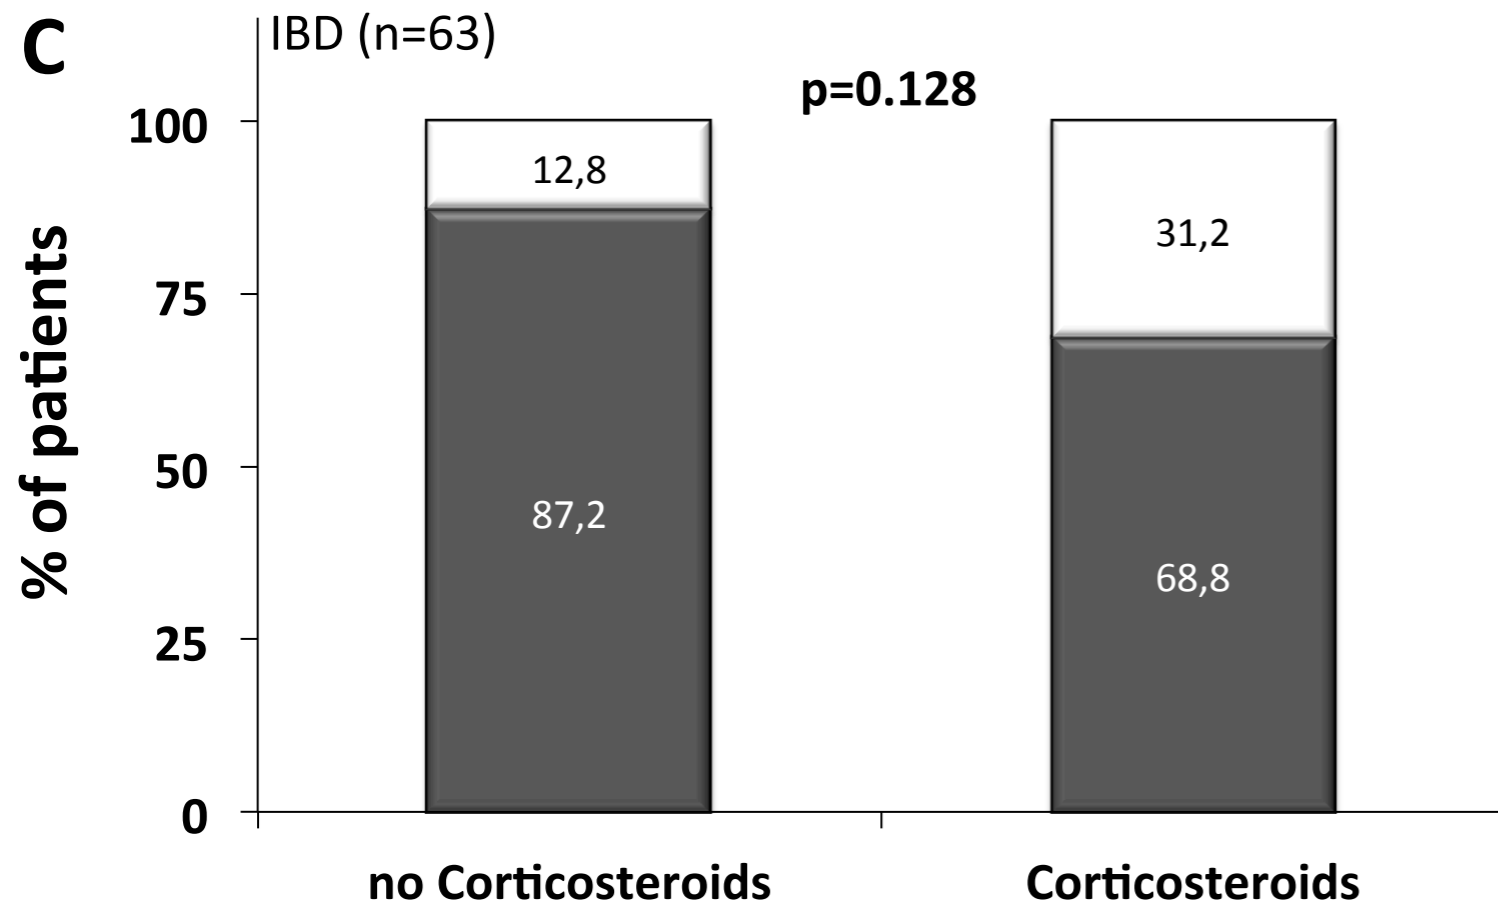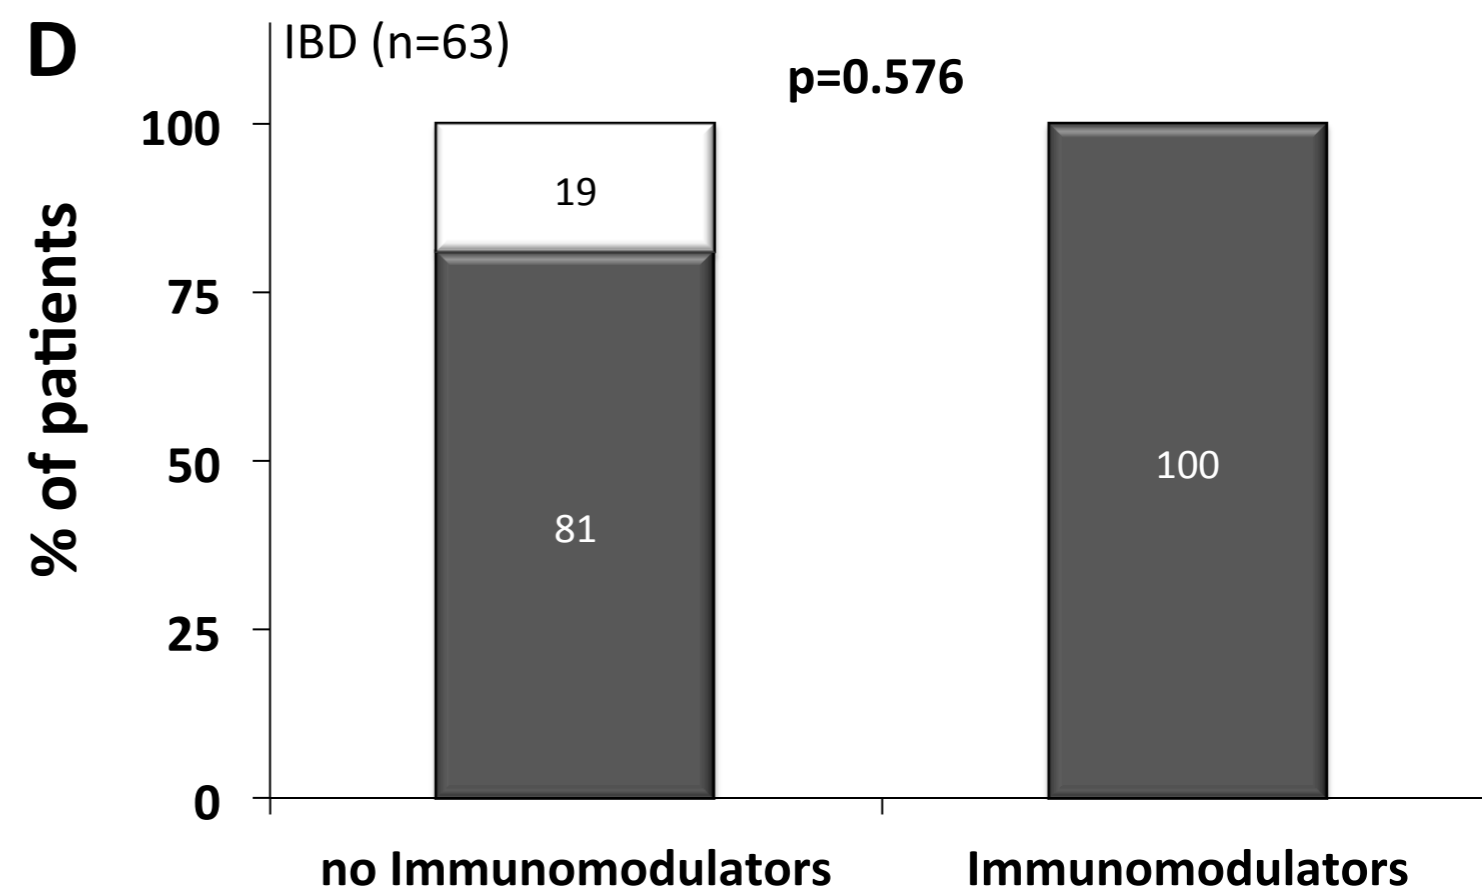

■ MAP negative  
□ MAP positive

Supplement: MOESM5 [file 9437278]
